# Supplementary material for: Evidence for a Golgi-to-Endosome Protein Sorting Pathway in Plasmodium falciparum
Source: PubMed Central journal article supplement (PMC3934947; doi:10.1371/journal.pone.0089771), 2014-02-25
Supplement: pone.0089771.s001.pdf [file pone.0089771.s001.pdf]

**Figure S1. Sequence alignments**

**C. Vps35**

```

PfVps35      1 MSTYKDNNNHNNHNSNMNTIDQKKFLDECIFVVKEQSFYMKQALENGSLRDT 52
HsVps35      1 MPTTQQSPQD-----EQEKLLDEAIQAVKVQSFQMKRCLDKNKLM 42
ScVps35      1 MAYADSPE-----NATAVIKQRTALMNRCLSQHKLMES 33

PfVps35      53 LKYASNMLCELRTSHLSPKYYYELYMLIFNELQHLDNFISDKKKHKKKFIDI 104
HsVps35      43 LKHASNMLGELRTSMLSPKSYEYELMAISDELHYLEVYLTDEFQAKGRKVADL 94
ScVps35      34 LQHTSIMLTELNPNSPKKYELYVIFDLSLTNLSYLIENHPQNHHLADL 85

PfVps35      105 YESVQHAGNIIPRLYLLIIVGRNYIKNKDIKAKYILKDMTELCCKGVQHPLRG 156
HsVps35      95 YELVQYAGNIIPRLYLLITVGVVYVKSFPQSRKDIKDLVEMCRGVQHPLRG 146
ScVps35      86 YELVQYTGNVVPRLYLMITVGTSYLTFNEAPKKEILKDMIEMCRGVQNPTRG 137

PfVps35      157 LFLRYFLIQMCKDRIPDTGSEYEEAGGGDINDAFEFLLTNFYESLKLWSRMN 208
HsVps35      147 LFLRNYLLOCTRNLPEGEPTDEETTGDISDSMDFVLLNFAEMNKLWVRM- 197
ScVps35      138 LFLRYYLSQRTKELLPED-----DPSFNSQFIMNFIEMNKLWVRL- 178

PfVps35      209 DKVLKVPNMIQDDNTMNSKIKILKEKMDVKMLVGSILVRMSOLEGMTKQYYI 260
HsVps35      198 -----OHQHSRDREKRERERQELRILVGTNLVRLSOLEGVNVERYK 239
ScVps35      179 -----OHQGPLRERETRTRERKELOILVGSOLVRLSQIIDDNFQMYK 220

PfVps35      261 ENCLPKILLYLSNINDCLIQQYIFESTVQVFSDECHIYSLEILLNAILKMNT 312
HsVps35      240 QIVLTGILEQVNVCRDALAQEYLMCEIIQVFPDEFHLQTLNPFLLRACAEHQ 291
ScVps35      221 QDILPTILEQVIQCRDLVSQEYLLDVICQVFADEFHLKTLDTLLQTTLHLNP 272

PfVps35      313 SIDFKSILITLLKRLRSFIEANNKCD-----LPKDIDIFNLFYDHLVYV 357
HsVps35      292 NVNVKNIITIALIDRLALFAHREDGPG-----IPADIKLFDIFSQQVATVI 336
ScVps35      273 DVSINKIVLTLVDRLNDYVTRQLEDDPNATSTNAYLMDMVFGEFWDYLTVLN 324

PfVps35      358 NRTLDYTKVNYNDSINRSPNEDHHGYTHNDLSKGGKAKDIINNNDDNNDDNN 409
HsVps35      337 QSRQD----- 341
ScVps35      325 HERPD----- 329

PfVps35      410 NNKDNDNNNNNNNNNNNNNNNNNNNNNNNNNNNNNNNNNNNNNNNNNNNN 461
HsVps35      -----
ScVps35      -----

PfVps35      462 MNQTNNDLNNNNIINNMGHINTNDLNKNNTGKNCTIVNTDEFVNNVVKMLQV 513
HsVps35      342 -----MPSEDVVS 350
ScVps35      330 -----LSLQQFIPL 338

PfVps35      514 IYEFIFLCIRIYDDDI-IISKLFGLPYTIVSNVNMNNDTICEEIIISIVL 564
HsVps35      351 QVSLINLAMKCPDRVDYVDKVLQETTVEIFNKLNLEHIATSS----- 392
ScVps35      339 VESVIVLSLKWYPNNFDNLNKLQFELVQTKDYGQKNISLESEHLFLVLLSF 390

PfVps35      565 NYLGLSALNARNMQTLLNSITEKHKKLSLDIIDAIIECKKKYITYEDVEKI 616
HsVps35      393 -----AVSKELTRLLKIPVDTYNNILTVLK--LKHFHPLFEYFDYESRKS 436
ScVps35      391 QNSKL-QLTSSTAPPNSPVTSKKHFIQOLISQCQAYKNILALQISLQKKV 441

PfVps35      617 LKYISYIFHEK-DKKNKNDE-----DIFNLENNNSAY 648
HsVps35      437 SCYVLSNVLDYNTTEIVSQDQ-----VDSIMNLVSTL 467
ScVps35      442 VNEIIDILMDREVEEMADNDSESKLHPPGHSAYLVIEDKLVQVRLSICEPL 493

PfVps35      649 TCEKICKFFHIIITNTKNIEEKYNICMLFYKYISNSTYLVHLLPTIIFTLLHV 700
HsVps35      468 IQDQDPDQVEDPDPEDFADE-----QSLVGRFIHL 497
ScVps35      494 IISRSGPPANVASSDTNVEVF-----FNRHDEEESWILDPIQEKLAHLIHW 540

```

**Figure S1. Sequence alignments**

PfVps35 701 VTQITKLGQEDHFNQDDKNNNMNTIDTIDSNNNNNNDNNSNCNNDNSNIDSN 752  
HsVps35 498 LRSEDP-----DQOYLILNTARKHFAGGN----- 522  
ScVps35 541 IMNTTSRKQTMKNKIQFSLEAQLEILLIKSSFIKGG----- 577

PfVps35 753 HTMDNEKKEDFINSSDSYNIYPNDNDKQNLNNYLHNNQNNFILDEKKINQYN 804  
HsVps35 523 -----QRIRFTLPPLVFAAYQLAFRYK-----ENSKVDDKWE 554  
ScVps35 578 -----INVKYTFPAIITNFWKLMRKRMIQEYLLKGRP---DNKTLLSHY 620

PfVps35 805 IYVKNIFKFIHTNLLTVAS----QMPIITFKLFLYSIAIVVNNYNSFVQTHEF 852  
HsVps35 555 KKCQKIFSAHOTISALIK---AELAEPLRRLFLOGALAAG-----E 593  
ScVps35 621 NLLKQMFKFVSRCLINDIFNSCNSCTDLILKLNLCAILAD-----Q 662

PfVps35 853 LTFDNLEAICYEFITOPLIIEEEDINISAOQFDCIVWIVGILCTHINLLDNE 904  
HsVps35 594 IGFENHETVAYEFMSQAFSLYEDEISDSKAQLAAITLIIGTFERMK-CFSEE 644  
ScVps35 663 LQLN---EISYDFFSQAFTIFEESLSDSKTQLOALIIYIAQSLQKTRSLYKE 711

PfVps35 905 NYNNIALKLTQHANKLLKKKQDCIGVLKCSHLYW-----ENKKY 943  
HsVps35 645 NHEPLRTOCALAASKLLKKPDQGRAVSTCAHLFW-----SGRNTDKNGEEL 690  
ScVps35 712 YYDSLIVRCTLHGSKLLKKQDCRAVYLCSHLWWATEISNIGEEEGITDNFY 763

PfVps35 944 RNSNKVIECLQKSIKNAEIAIQSNNDNIILFTYMLDKYLYYYEAQN---IDV 992  
HsVps35 691 HGGKRVMECLKKALKIANQ-CMDPSLQVQLFIEILNRYIYFYEKEN---DAV 738  
ScVps35 764 RDGKRVLECLQRSLRVADS-IMDNEQSCELMVEILNRCLYYFIHGDESETHI 814

PfVps35 993 SEETLHYLIDICQDYNNKT--NDDTN----- 1016  
HsVps35 739 TIQVLNQLIQKIREDLPNLESSEETEQ----- 765  
ScVps35 815 SIKYINGLIELIKTNLKSILKLEDNSASMITNSISDLHITGENNVKASSNADD 866

PfVps35 1017 -----FKQ 1019  
HsVps35 -----I 766  
ScVps35 867 GSVITDKESNVAIGSDGTYIQLNTLNGSSTLIRGVVATASGSKLLHQLKYIP 918

PfVps35 1020 EYKKVIKYVHDKQKNSNVFQKINIDTSILRS 1050  
HsVps35 767 NKHFHNTLEHLRRLRESPESGPIYEGLLIL 796  
ScVps35 919 IHFRRTCEYIESQREVDRFKVLYV 944

**D. Rab7**

PfRab7 1 MSNKKRTILKVIILGDSGVGKTSLMNQYVNKKFTNQYKATIGADFLTKEITVD-N 54  
HsRab7a 1 MTSRKKVLLKVIILGDSGVGKTSLMNQYVNKKFSNQYKATIGADFLTKEVMVD-D 54  
Ypt7p 1 MSSRKKNILKVIILGDSGVGKTSLMHRYVNDKYSQQYKATIGADFLTKEVTVDGD 55

PfRab7 55 EQITMQIWDTAGQERFQSLGVAFYRGADCCVLVFDLITNYKTYESLESWKDEFLLIQ 109  
HsRab7a 55 RLVTMQIWDTAGQERFQSLGVAFYRGADCCVLVFDVITAPNTFKTLDWRDEFLLIQ 109  
Ypt7p 56 KVAITMQVWDTAGQERFQSLGVAFYRGADCCVLVYDVTNASSFENIKSWRDEFLLVH 110

PfRab7 110 ASPKDPENFPFVVIIGNKVDET-NKRKVQSLKVLQWCKSNNNIPYFETSAKNAINV 163  
HsRab7a 110 ASPRDPENFPFVVLGNKIDLE-N-ROVATKRAQAWCYSKNNIPYFETSACEAINV 162  
Ypt7p 111 ANVNSPETFPFVILGNKIDAEESKKIVSEKSAQELAKSLGDIPLFLTSAKNAINV 165

PfRab7 164 DQAFDEIARKAMKQEHQEEQIY--LPETFALNNQSEQKMYKSRC 206  
HsRab7a 163 EQAFQTIARNALKQE-TEVELYNFPEPIKLDKNDRAKASAESCSC 207  
Ypt7p 166 DTAFFEIARSALQONQADTEAF---EDDYNDAINIRLDGENNSCSC 208
