# Supplementary material for: Evidence for a Golgi-to-Endosome Protein Sorting Pathway in Plasmodium falciparum
Source: PubMed Central journal article supplement (PMC3934947; doi:10.1371/journal.pone.0089771), 2014-02-25

**Figure S2. Southern blot characterization of transgenic parasite lines.**

**A. PfVps29-YFP**

B = BamHI, N = NotI

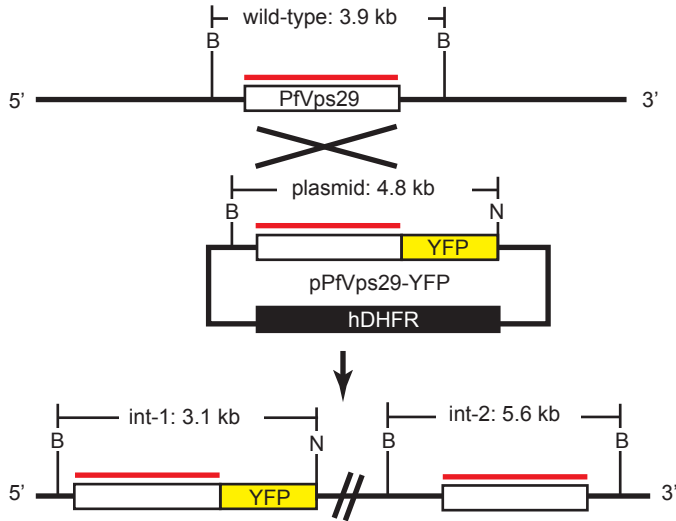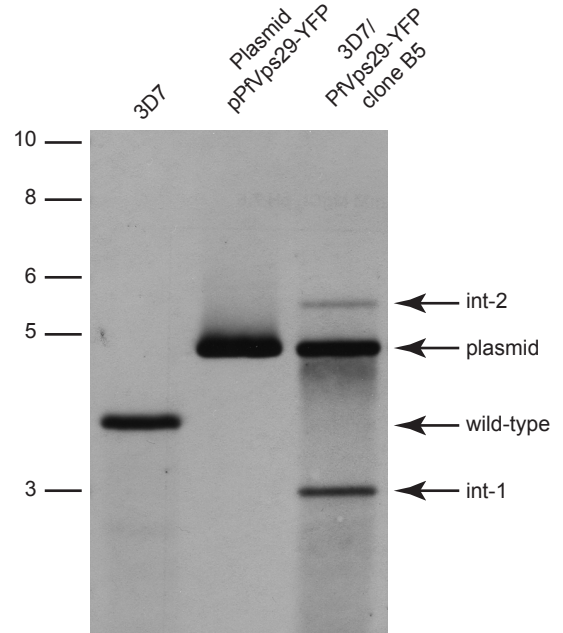

**B. PfVps35-YFP**

H = HindIII

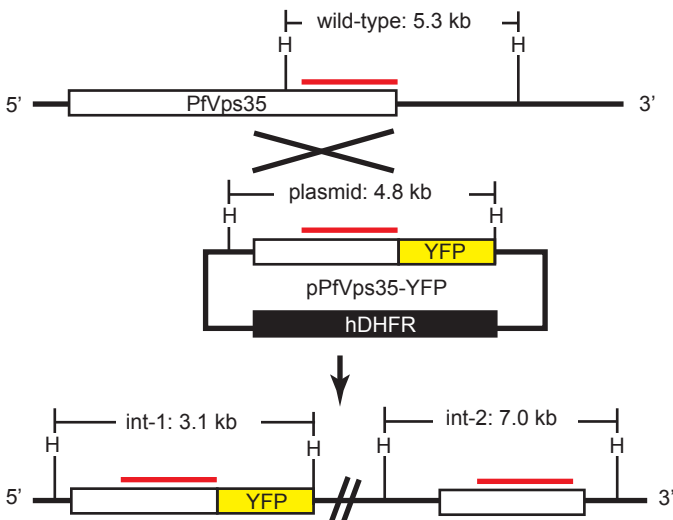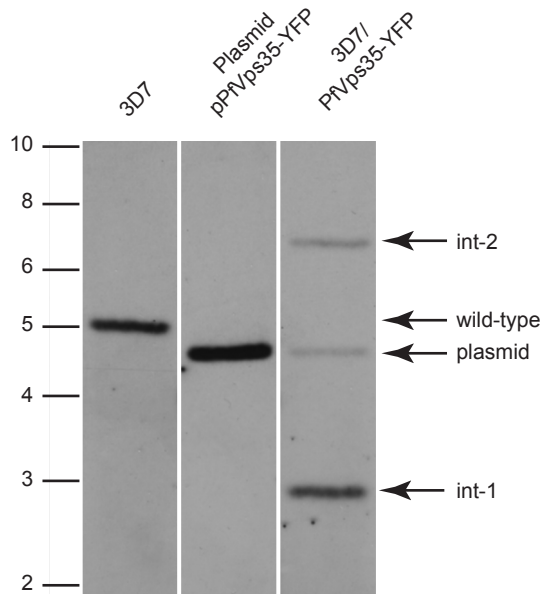

**Figure S2. (Continued)**

**C. PfVps35 gene disruption**

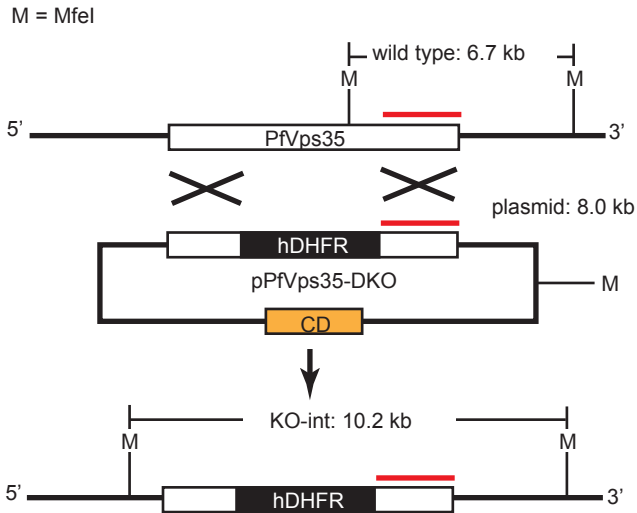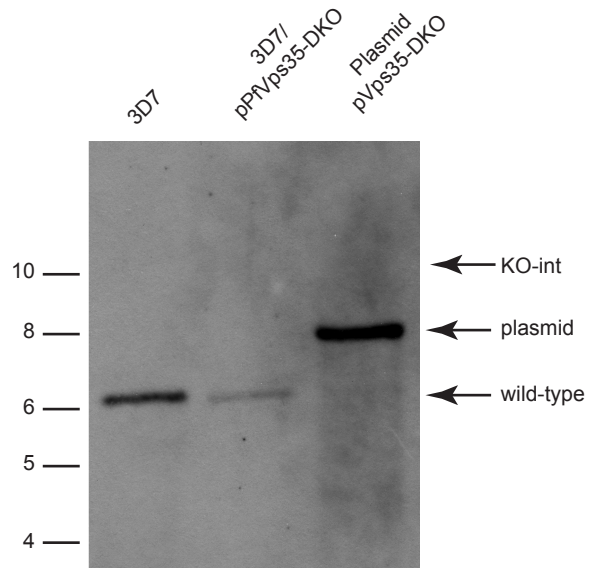

**D. DD-mCherry-PfRab7**

P=Pacl, N=NotI

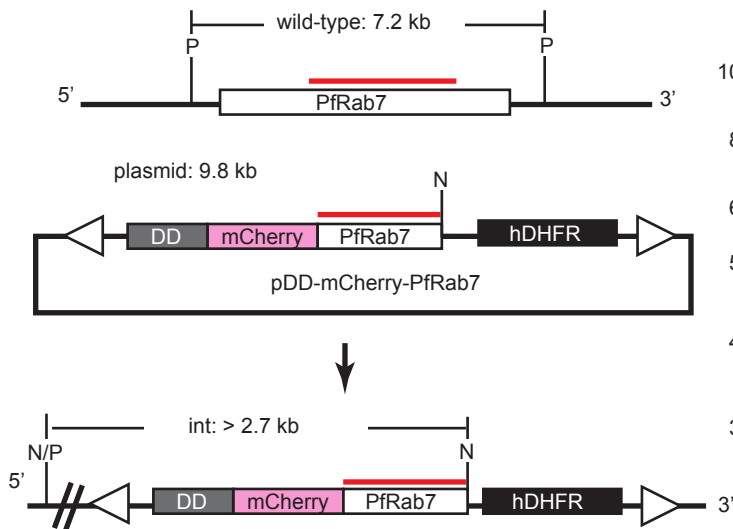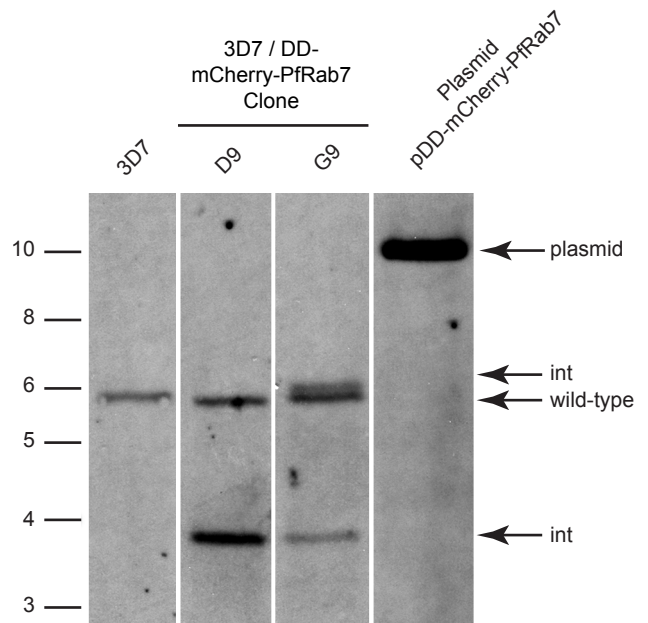

Figure S2. (Continued)

E. PfVps35-HA

H = HindIII

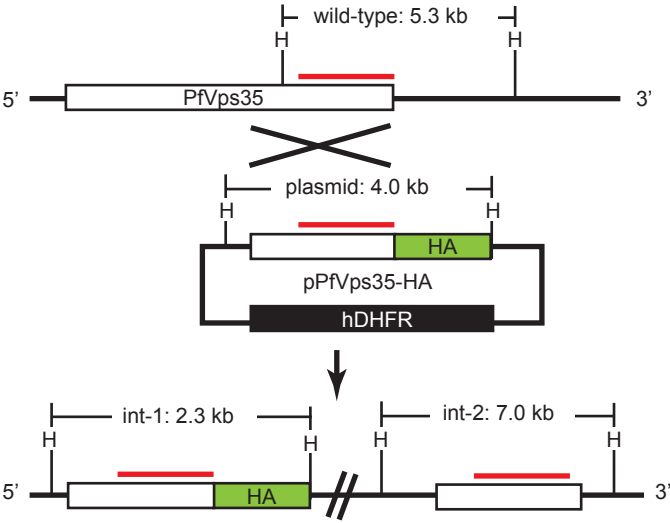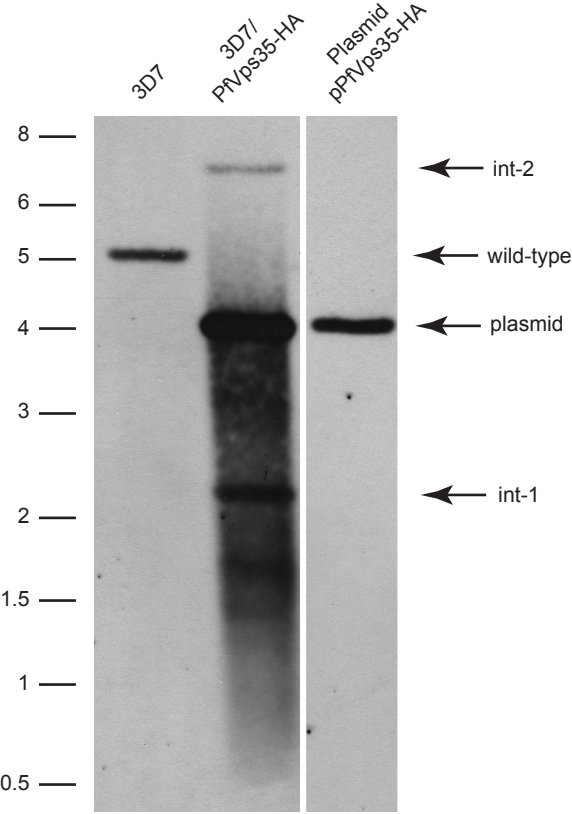

Supplement: pone.0089771.s002.pdf [file pone.0089771.s002.pdf]
