# Supplementary material for: Evidence for a Golgi-to-Endosome Protein Sorting Pathway in Plasmodium falciparum
Source: PubMed Central journal article supplement (PMC3934947; doi:10.1371/journal.pone.0089771), 2014-02-25

**Figure S3. Generation of a parasite line expressing PfSortilin-HA.**

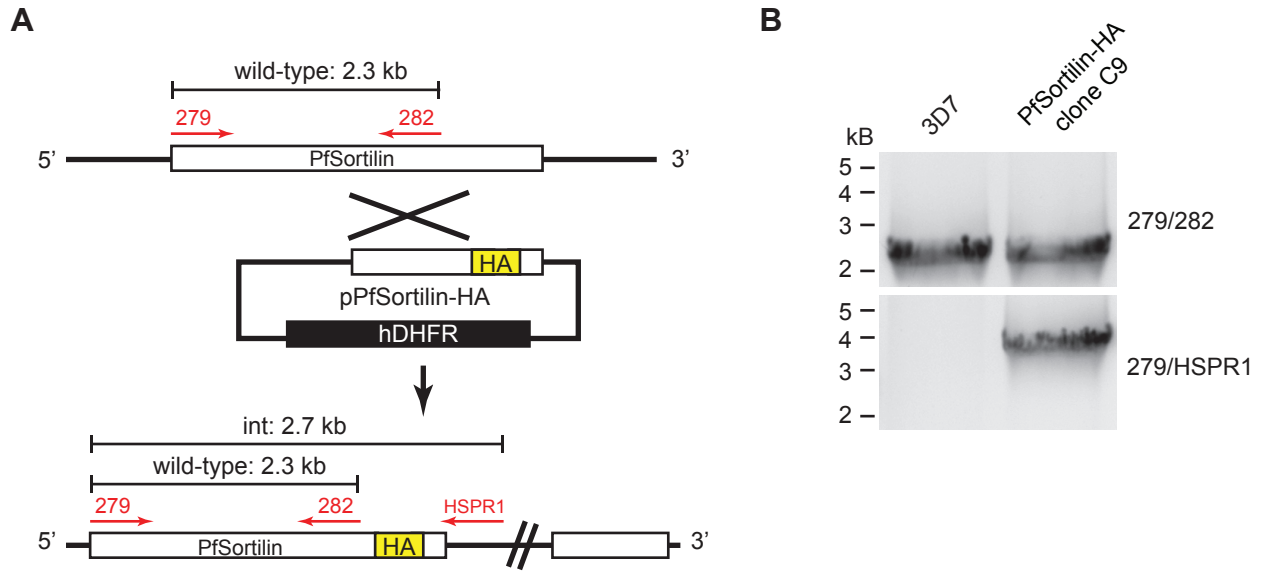

Supplement: pone.0089771.s003.pdf [file pone.0089771.s003.pdf]
