# Supplementary material for: Evidence for a Golgi-to-Endosome Protein Sorting Pathway in Plasmodium falciparum
Source: PubMed Central journal article supplement (PMC3934947; doi:10.1371/journal.pone.0089771), 2014-02-25
Supplement: pone.0089771.s004.pdf [file pone.0089771.s004.pdf]

**Table S1: Sequences of oligonucleotides used in this study.** Restriction sites are underlined. Where two restriction sites are present, the second is double underlined. RE, restriction endonuclease; UTR, untranslated region; ecDHFR-DD, *E. coli* dihydrofolate reductase destabilization domain; yDHOD, yeast dihydroorotate dehydrogenase; HA, hemagglutinin epitope tag; PfAPP, *P. falciparum* aminopeptidase P; HSP, heat shock protein.

| Name | Oligonucleotide Sequence (5' to 3')                                                   | RE site    | Purpose                           |
|------|---------------------------------------------------------------------------------------|------------|-----------------------------------|
| 334  | GCACG <u>CTCGAG</u> AGTGGGAAATTGGAAGATATTGG                                           | XhoI       | PCR: PfVps29 bases 4 to 582       |
| 335  | GCACG <u>CCTAGG</u> TATAACTGTTGACTTATGTAGTTCAC                                        | AvrII      |                                   |
| 352  | GCACG <u>CTCGAG</u> ATACCAATTTATTAACAGTAGCTAGC                                        | XhoI       | PCR: PfVps35 bases 2444 to 3150   |
| 353  | GCACG <u>CCTAGG</u> TGATCTCAATATGGATGTATCTATATTAATTTTCTG                              | AvrII      |                                   |
| 428  | GCACG <u>CTCGAG</u> CTATATCAAAAAGATC                                                  | XhoI       | PCR: PfVps26 bases 257 to 891     |
| 429  | GCACG <u>CCTAGG</u> ACCCATTTTTTTTCG                                                   | AvrII      |                                   |
| 344  | GTACG <u>CCGCGG</u> AAAATATGCCTCAAATATGCTGTGC                                         | SacII      | PCR: PfVps35 bases 368 to 938     |
| 345  | GTACG <u>ACTAGT</u> AGATCCAACAACTAACATTTTACATCC                                       | SpeI       |                                   |
| 346  | GTACG <u>CCATGG</u> TTATTAACAGTAGCTAGCCAAATGC                                         | NcoI       | PCR: PfVps35 bases 2661 to 3238   |
| 347  | GTACG <u>CCTAGG</u> TTATTGTAATAATCTTGGCATATGTC                                        | AvrII      |                                   |
| 456  | GCACG <u>CTCGAG</u> CCGTGTTATTATTTAAAGATGAGTGG                                        | XhoI       | PCR: PfVps29 bases 1 to 582       |
| 457  | GTACG <u>CCTAGG</u> TATAACTGTTGACTTATGTAGTTCAC                                        | AvrII      |                                   |
| 458  | GCACG <u>CCCCGG</u> TCTATTTTCTGTTTTCAATTTTTCACAC                                      | XmaI       | PCR: PfVps29 5' UTR (-800 to -20) |
| 459  | CACG <u>GCTCGAG</u> AAAAAAAAAAAAAAAAATATATGAAAATA                                     | XhoI       |                                   |
| 460  | GTACG <u>CCTAGG</u> GAAAATTTATATTTTCAAAGTGTGAGCAAGGGCGAGGAGGATAAC                     | AvrII      | PCR: mCherry bases 4 to 711       |
| 461  | GTACG <u>GCGGCC</u> GCTTACTTGTACAGCTCGTCCATGC                                         | NotI       |                                   |
| 470  | GTACG <u>CTCGAG</u> CTTAAAAGAATAATAATGATCAGTCTGATTGCGGCGTTAG                          | XhoI       | PCR: ecDHFR-DD bases 1 to 474     |
| 471  | GTACG <u>CCTAGG</u> TCCTCCTCCTCCTCCCGCCGCTCCAGAATCTCAAAGC                             | AvrII      |                                   |
| 484  | GTACG <u>CCTAGG</u> GTGAGCAAGGGCGAGGAGGATAAC                                          | AvrII      | PCR: mCherry bases 4 to 708       |
| 485  | GTACG <u>GCGGCC</u> GCTACT <u>C</u> CGCGGACTTTGAAAATATAAATTTTCCTTGTACAGCTCGTCCATGCCGC | SacII/NotI |                                   |
| 476  | GTACG <u>CCCCGG</u> GAATAAAAACATTTTAATTGCACATGTGTG                                    | XmaI       | PCR: PfRab7 5' UTR (-880 to -17)  |
| 477  | GTACG <u>CTCGAG</u> TIGTTCTTTTTTTTTTTTTTTTTTTTATTTAAATTTGATTTTAC                      | XhoI       |                                   |
| 478  | GTACG <u>CCGCGG</u> TCAAATAAAAAAGAACCATATTTAAAG                                       | SacII      | PCR: PfRab7 bases 4 to 621        |
| 479  | GTACG <u>GCGGCC</u> GCTTAACAACAACGACTTTTGTACATTTTTTG                                  | NotI       |                                   |
| 480  | GTACG <u>CCCCGG</u> TTTCTTTTGTGTTGAATTTAAATATTTTAGAG                                  | XmaI       | PCR: PfRab6 5' UTR (-806 to -16)  |
| 481  | GTACG <u>CTCGAG</u> AAAATAAAAAATATTTTAAATTAAGAATTAGTC                                 | XhoI       |                                   |

|       |                                                                                         |             |                                                               |
|-------|-----------------------------------------------------------------------------------------|-------------|---------------------------------------------------------------|
| 482   | GTACG <u>CCGCGGG</u> GATGAATTTCAA <u>AACTCGGG</u> AC                                    | SacII       | PCR: PfRab6 bases 4 to 624                                    |
| 483   | GTACG <u>GCGGCCG</u> CTTAACATAAAACATTTACTTAACATATTTTTG                                  | NotI        |                                                               |
| 597   | GTACG <u>GCGGCCG</u> CTTACTTGTACAGCTCGTCCATGC                                           | NotI        | PCR: mCherry with 3' stop codon                               |
| 598   | GTACG <u>GCGGCCG</u> CTTAACGACTTTTGTACATTTTTTGTTCG                                      | NotI        | PCR: PfRab7ΔCC bases 4 to 612                                 |
| 599   | GTACGAGATCTTACT <u>CCGCGG</u> TCAAATAAAAAAAGAACCATATTA <u>AAAAG</u>                     | BglII/SacII | PCR: PfRab7 transfer to pSP72                                 |
| 600   | GTACG <u>CTCGAGT</u> ACT <u>GCGGCCG</u> CTTAACAACAACGACTTTTGTACATTTTTTG                 | XhoI/NotI   |                                                               |
| 591   | CTTGGAGATAGTGGTGTGGTAAAAATTCATTAATGAATCAATATGTG                                         | none        | Quikchange: PfRab7 T22N                                       |
| 592   | CACATATTGATTCATTAATGAATTTTTACCAACACCACTATCTCCAAG                                        | none        |                                                               |
| 593   | GATATGGGATACTGCAGGACTAGAACGTTTTCAAAGTTTAGGAG                                            | none        | Quikchange: PfRab7 Q67L                                       |
| 594   | CTCCTAAACTTTGAAAACGTTCTAGTCCTGCAGTATCCCATATC                                            | none        |                                                               |
| 595   | GAAAATTTTCCTTTTGTATTATTGGACTTAAAGTTGATGAAACAAATAAAAG                                    | none        | Quikchange: PfRab7 N125I                                      |
| 596   | CTTTTATTTGTTTCATCAACTTTAAGTCCAATAATAACAAAAGGAAAATTTTC                                   | none        |                                                               |
| 251   | GTACGCCC <u>GGTAA</u> GTTTTTTTTTTATTTGATATAGAAAC                                        | XmaI        | PCR: PfAPP 5' UTR (-865 to -39)                               |
| 144   | GCACGCTCGAGATTTAAAAA <u>AAAAA</u> AGAAAGAAAG                                            | XhoI        |                                                               |
| HSPR1 | TATATATGTATATTGGGGTGATG                                                                 | none        | Sequencing: HSP86 3' UTR reverse                              |
| 276   | GCACGCTCGAGGTCAATATTATTTATAATATTTATCATGG                                                | XhoI        | PCR: PfSortilin bases 2476 to 3106                            |
| 283   | GTACG <u>CCTAGGT</u> GAAAGGTGATATATTCCTTGAGGT                                           | AvrII       |                                                               |
| 286   | <u>CTAGGT</u> ATCCATATGATGTACCAGATTATGCAAAAAATTATGCAGATAATATTGAATTATTA<br>TAAG <u>C</u> | AvrII/NotI  | Annealing oligos: HA tag<br>and PfSortilin bases 3107 to 3139 |
| 287   | <u>GGCCG</u> CTTATAATAATTCAATATTATCTGCATAATTTTTTGCATAATCTGGTACATCATATGG<br>ATAC         | AvrII/NotI  |                                                               |
| 501   | CTACGAGATCTCATTTTGTAAAAAAATTA <u>AAATATATTTATAT</u>                                     | BglII       | PCR: yDHOD cassette                                           |
| 502   | CTACGGAATTC <u>TTAATAA</u> ATATGTTCTTATATATAATGAG                                       | EcoRI       |                                                               |
| 245   | TCGAAGGCGCCATATA <u>CCCGGG</u> ATATAC                                                   | KasI/XmaI   | Annealing oligos: pXL-BacII linker                            |
| 246   | TCGAGTATAT <u>CCCGGG</u> TATAT <u>GGCGCCT</u>                                           | XmaI/KasI   |                                                               |

---
