# Supplementary material for: Evidence for a Golgi-to-Endosome Protein Sorting Pathway in Plasmodium falciparum
Source: PubMed Central journal article supplement (PMC3934947; doi:10.1371/journal.pone.0089771), 2014-02-25
Supplement: pone.0089771.s005.pdf [file pone.0089771.s005.pdf]

**Table S2: Plasmids generated in this study.** YFP, yellow fluorescent protein; DD, *E. coli* dihydrofolate reductase destabilization domain; HA, hemagglutinin tag; hDHFR, human dihydrofolate reductase; yDHOD, yeast dihydroorotate dehydrogenase.

**A. Plasmids for chromosomal integration by homologous recombination.**

| Protein    | Modification                                        | Resistance | Name         |
|------------|-----------------------------------------------------|------------|--------------|
| PfVps29    | C-terminal YFP                                      | hDHFR      | pPfVps29-YFP |
| PfVps26    | C-terminal YFP                                      | hDHFR      | pPfVps26-YFP |
| PfVps35    | C-terminal YFP                                      | hDHFR      | pPfVps35-YFP |
|            | C-terminal HA                                       | hDHFR      | pPfVps35-HA  |
|            | Double cross-over recombination for gene disruption | hDHFR      | pPfVps35-DKO |
| PfSortilin | Internal HA tag                                     | hDHFR      | pSortilin-HA |

**B. Plasmids carrying *piggyBac* transposable expression cassettes.**

| Gene    | Cassette organization ( <i>promoter/coding sequences</i> )        | Resistance | Name                            |
|---------|-------------------------------------------------------------------|------------|---------------------------------|
| PfVps29 | <i>pfvps29</i> /PfVps29-mCherry                                   | hDHFR      | pPfVps29-mCherry                |
|         | <i>pfvps29</i> /PfVps29-mCherry                                   | yDHOD      | pPfVps29-mCherry-yDHOD          |
| PfRab7  | <i>pfrab7</i> /DD-mCherry                                         | hDHFR      | pDD-mCherry                     |
|         | <i>pfrab7</i> /DD-mCherry-PfRab7                                  | hDHFR      | pDD-mCherry-PfRab7              |
|         | <i>pfrab7</i> /DD-mCherry-PfRab7                                  | yDHOD      | pDD-mCherry-PfRab7-yDHOD        |
|         | <i>pfrab7</i> /DD-mCherry-PfRab7(C-terminal 2-residue truncation) | hDHFR      | pDD-mCherry-PfRab7 $\Delta$ ACC |
|         | <i>pfrab7</i> /DD-mCherry-PfRab7 T22N                             | hDHFR      | pDD-mCherry-PfRab7T22N          |
|         | <i>pfrab7</i> /DD-mCherry-PfRab7 N125I                            | hDHFR      | pDD-mCherry-PfRab7N125I         |
|         | <i>pfrab7</i> /DD-mCherry-PfRab7 Q67L                             | hDHFR      | pDD-mCherry-PfRab7Q67L          |
|         | <i>pfapp</i> /DD-mCherry-PfRab7 T22N                              | hDHFR      | pPfAPPp-DD-mCherry-PfRab7T22N   |
|         | <i>pfapp</i> /DD-mCherry-PfRab7 N125I                             | hDHFR      | pPfAPPp-DD-mCherry-PfRab7N125I  |
|         | <i>pfapp</i> /DD-mCherry-PfRab7 Q67L                              | hDHFR      | pPfAPPp-DD-mCherry-PfRab7Q67L   |
| PfRab6  | <i>pfrab6</i> /DD-mCherry-PfRab6                                  | hDHFR      | pDD-mCherry-PfRab6              |
|         | <i>pfrab6</i> /DD-mCherry-PfRab6                                  | yDHOD      | pDD-mCherry-PfRab6-yDHOD        |
